# Supplementary material for: De novo and reference transcriptome assembly of transcripts expressed during flowering provide insight into seed setting in tetraploid red clover
Source: PubMed Central journal article supplement (PMC5347025; doi:10.1038/srep44383), 2017-03-13
Supplement: srep44383-s1.pdf [file srep44383-s1.pdf]

***De novo* and reference transcriptome assembly of transcripts expressed during flowering provide insight into seed setting in tetraploid red clover**

Mallikarjuna Rao Kovi<sup>1</sup>, Helga Amdahl<sup>1,2</sup>, Muath Alsheikh<sup>1,2,§</sup> and Odd Arne Rognli<sup>1</sup>

<sup>1</sup>*Department of Plant Sciences, Norwegian University of Life Sciences, NO-1432 Ås, Norway*

<sup>2</sup>*Graminor Breeding AS, Hommelstadvegen 60, NO-2322, Ridabu, Norway*

§Corresponding author: [muath.alsheikh@graminor.no](mailto:muath.alsheikh@graminor.no)

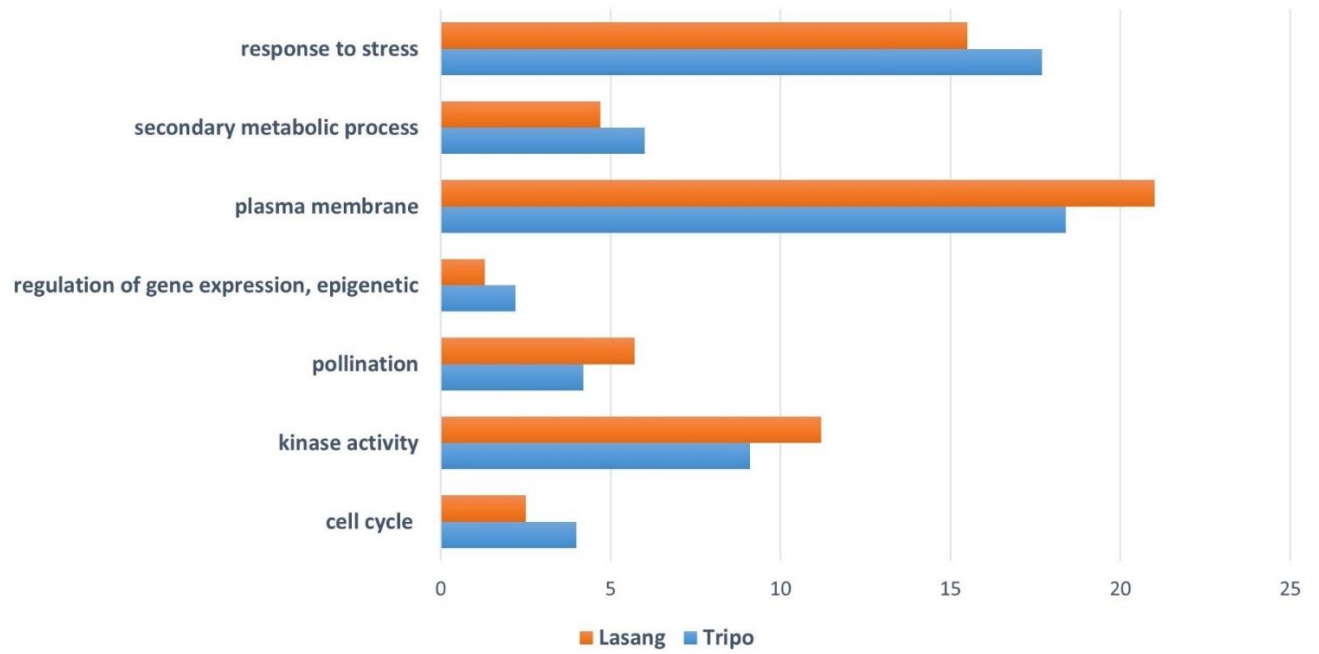

Supplementary Figure S1. Annotation differences between 'Lasang' and 'Tripo' genotypes detected by Fischer's exact test.

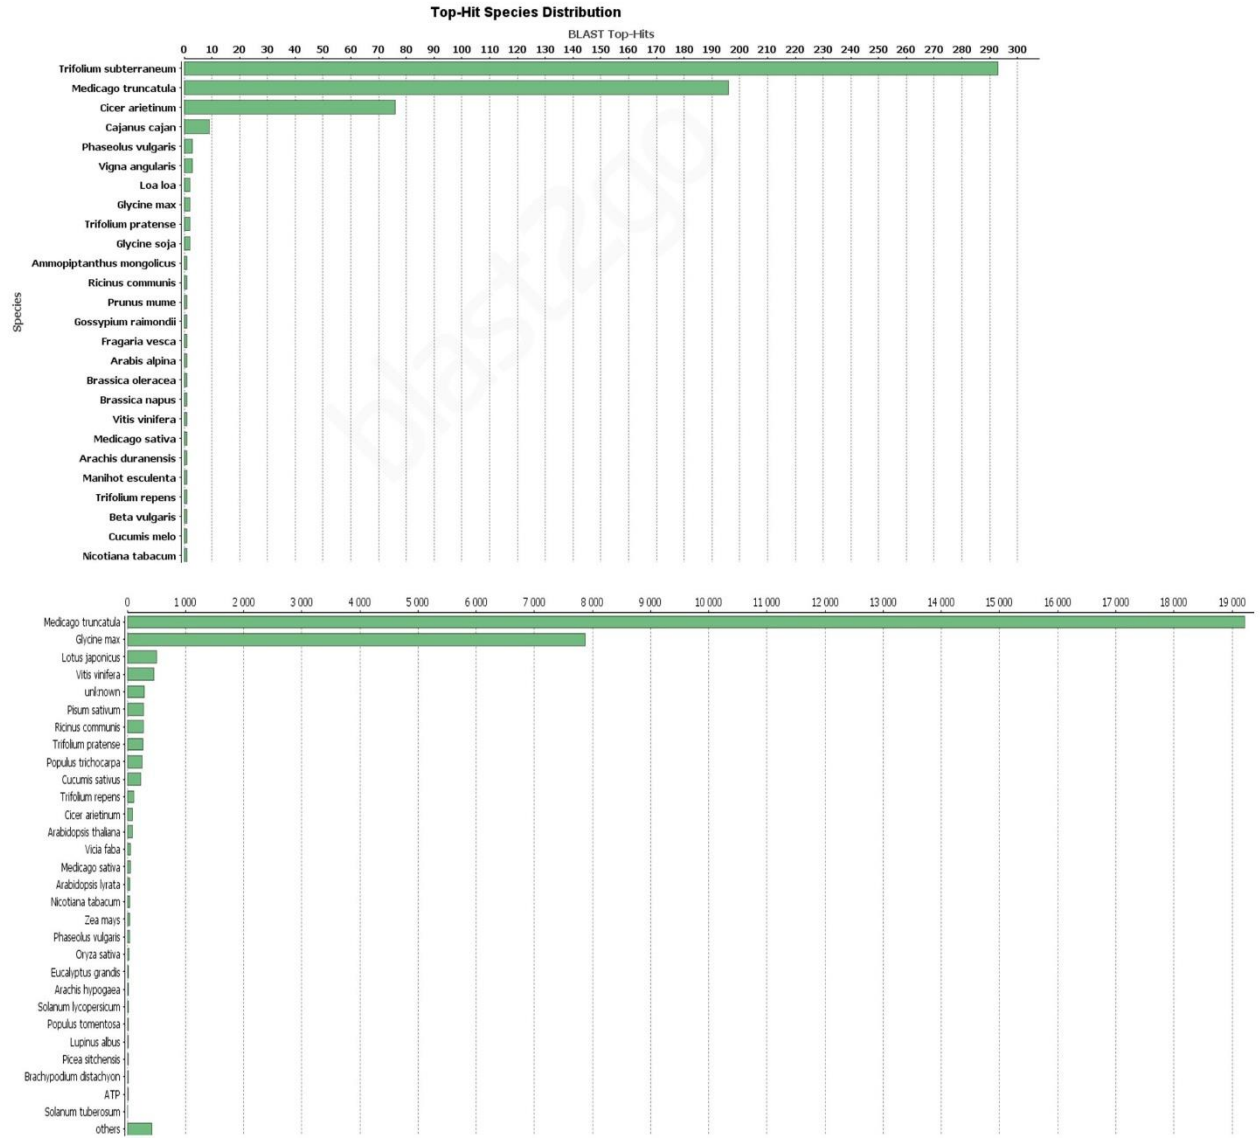

Supplementary Figure S2. The top blast hit-species distribution in reference based and *de novo* based assembly.

Supplementary Table S1. List of pathway-enriched differentially expressed genes in top ten pathways between ‘Tripo’ and ‘Lasang’ at EF-MF and MF-LF stages.

| Pathway                                     | Differentially expressed genes (No./%) | Pathway ID |
|---------------------------------------------|----------------------------------------|------------|
| Starch and sucrose metabolism               | 58 (4.84%)                             | map00500   |
| Pentose and glucuronate interconversions    | 34(2.84%)                              | map00040   |
| Phenylpropanoid biosynthesis                | 33 (2.75%)                             | map00940   |
| Purine metabolism                           | 28 (2.34%)                             | map00230   |
| Thiamine metabolisim                        | 24 (2.00%)                             | map00730   |
| Amino sugar and nucleotide sugar metabolism | 23 (1.92%)                             | map00520   |
| Drug metabolism - other enzymes             | 22 (1.83%)                             | map00983   |
| Aminobenzoate degradation                   | 18 (1.50%)                             | map00627   |
| Biosynthesis of antibiotics                 | 18 (1.50%)                             | map01130   |
| Flavonoid biosynthesis                      | 18 (1.50%)                             | map00941   |
